# Supplementary material for: Effect of Laryngoscope Blade Size on First Pass Success of Tracheal Intubation in Critically Ill Adults
Source: PubMed Central journal article supplement — Crit Care Explor. 2023 Mar 6;5(3):e0855. doi: 10.1097/CCE.0000000000000855 (PMC9990830; doi:10.1097/cce.0000000000000855), 2023-03-06
Supplement: cc9-5-e0855-s001.pdf [file cc9-5-e0855-s001.pdf]

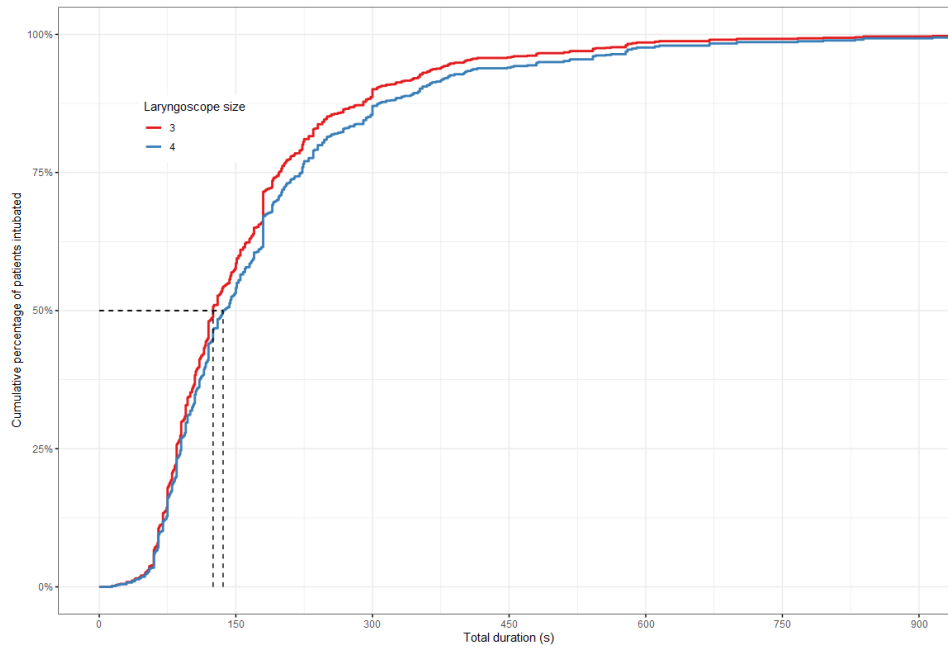

Supplemental Figure 1 Adjusted Event Analysis Curve comparing Macintosh Curved Blade size four to size three for endotracheal intubation using direct laryngoscopy. There was no statistically significant difference between blade sizes.

| Duration of Intubation              | Intubated on the first attempt |                      | Not intubated on the first attempt |                      |
|-------------------------------------|--------------------------------|----------------------|------------------------------------|----------------------|
|                                     | Mac 3<br>(N = 174.1)           | Mac 4<br>(N = 247.4) | Mac 3<br>(N = 41.0)                | Mac 4<br>(N = 99.8)  |
| Total duration of intubation (sec)* |                                |                      |                                    |                      |
| Mean (SD)                           | 130.9 (72.5)                   | 126.7 (72.6)         | 311.8 (159.8)                      | 326.5 (198.3)        |
| Median [Q25, Q75]                   | 110 [76.5, 170.0]              | 110.5 [81.5, 155.0]  | 300.0 [203.25, 424.8]              | 290.0 [203.0, 384.0] |

Supplemental Table 1 Duration of intubation of those intubated on 1<sup>st</sup> attempt versus those who required more than one attempt.

| Equipment used for Multiple Attempts | Mac 3        | Mac 4        |
|--------------------------------------|--------------|--------------|
| Additional equipment:                | 29.0 (70.8%) | 54.5 (53.8%) |
| Direct Laryngoscopy                  | 2.0 (4.8%)   | 4.6 (4.6%)   |
| Video Laryngoscopy                   | 27.0 (66.0%) | 49.8 (49.2%) |
| Bougie                               | 12.0 (29.2%) | 40.5 (40.0%) |
| Reposition*                          | 4.8 (11.7%)  | 4.6 (4.5%)   |

Supplemental Table 2 Equipment used for multiple attempts. No significant differences using a 6 chi-square test.
